# Supplementary material for: A benzimidazole-based highly selective colorimetric and far-red fluorometric pH sensor for intracellular imaging
Source: Royal Society of Chemistry journal article supplement (doi:10.1039/c8nj02185f), 2018-01-01
Supplement: c8nj02185f1.pdf [file c8nj02185f1.pdf]

*Supporting Information for*

**A benzimidazole-based highly selective colorimetric and far-red  
fluorometric pH sensor for intracellular imaging**

Tao Gong<sup>a</sup>, Rong Li<sup>a</sup>, YangyangYuan<sup>a</sup>, BaofengYu<sup>a\*</sup>, Hong Zhao<sup>a</sup>, ZhizhenLiu<sup>a</sup>, Rui  
Guo<sup>a</sup>, Dan Su<sup>c</sup>, WentingLiang<sup>b\*</sup>, ChuanDong<sup>b\*</sup>

a. Department of Biochemistry and Molecular Biology, Shanxi Medical University, Taiyuan  
030001, China. E-mail: shanxiyangcheng@126.com

b. Institute of Environmental Sciences, Department of Chemistry, Shanxi University, Taiyuan  
030006, China. E-mail: liangwt@sxu.edu.cn; dc@sxu.edu.cn.

c. State Key Laboratory of Biotherapy, West China Medical School, Sichuan University, 29  
Wangjiang Road, Chengdu 610064, China.

**Table of Contents**

Fig.S1.  $\Delta F$  of **BVD** in various ethanol-water solution.

Fig.S2. UV-vis absorption spectra of **BVD** with decreasing pH.

Fig.S3. <sup>1</sup>H NMR spectrum of the probe **BVD**.

Fig.S4. <sup>13</sup>C NMR spectrum of the probe **BVD**.

Fig.S5. HR-MS spectrum of the probe **BVD**.

Fig.S6. Differential scanning calorimetry of **BVD**.

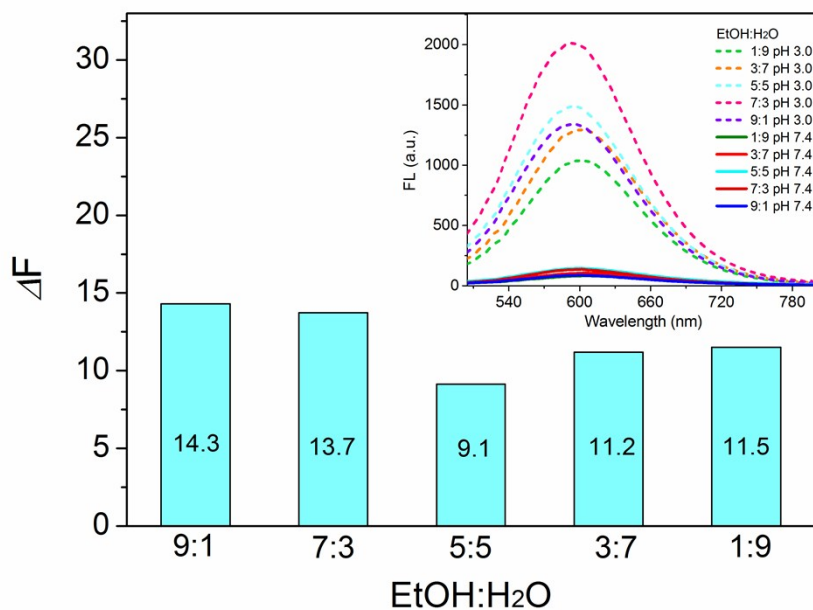

**Figure S1.**  $\Delta F$  at 605 nm of **BVD** (5  $\mu\text{M}$ ) in various ethanol-water solution (1:9, 3:7, 5:5, 7:3, 9:1, v/v, EtOH/H<sub>2</sub>O);  $\Delta F = (F_H - F_0)/F_0$ ,  $F_H$  is the fluorescence intensity at pH 3.0, and  $F_0$  is the fluorescence intensity at pH 7.4. Inset: the fluorescence spectra of **BVD** (5  $\mu\text{M}$ ) in various ethanol-water solution (1:9, 3:7, 5:5, 7:3, 9:1, v/v, EtOH/H<sub>2</sub>O) at pH 7.4 and 3.0

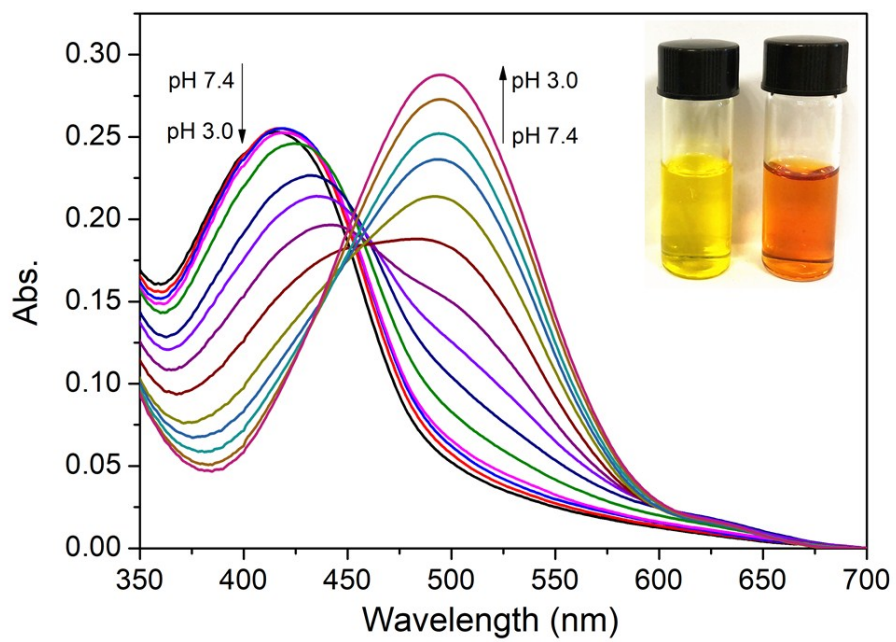

**Figure S2.** Changes of the UV-vis absorption spectra of **BVD** with decreasing pH from 7.4 to 3.0. Inset: the color of the solution changed from yellow to orange with decreasing pH.

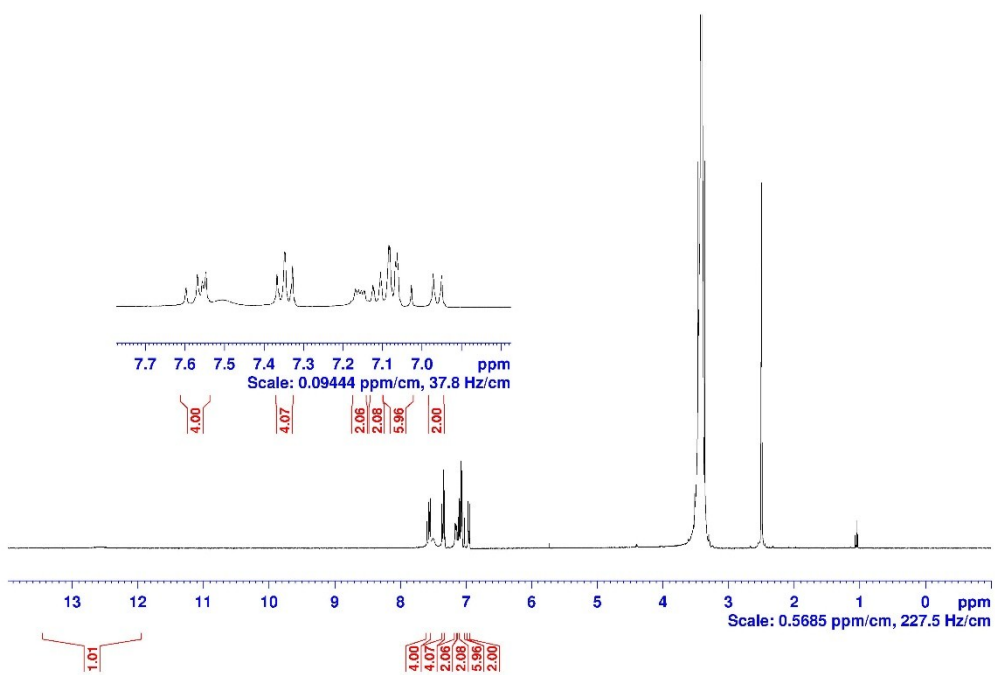

Figure S3. <sup>1</sup>H NMR spectrum of the probe BVD.

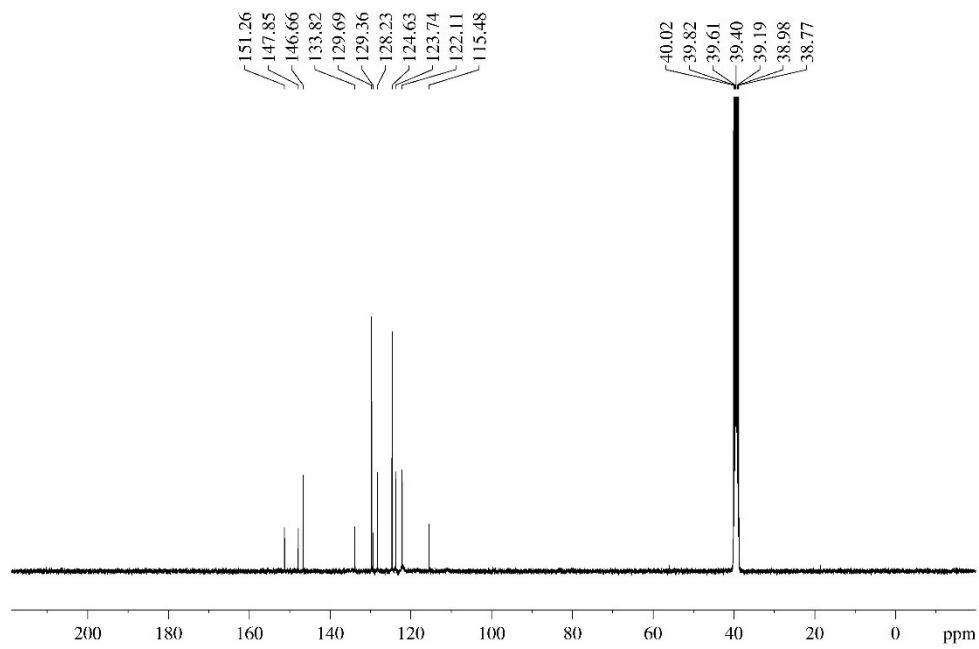

**Figure S4.**  $^{13}\text{C}$  NMR spectrum of the probe BVD.

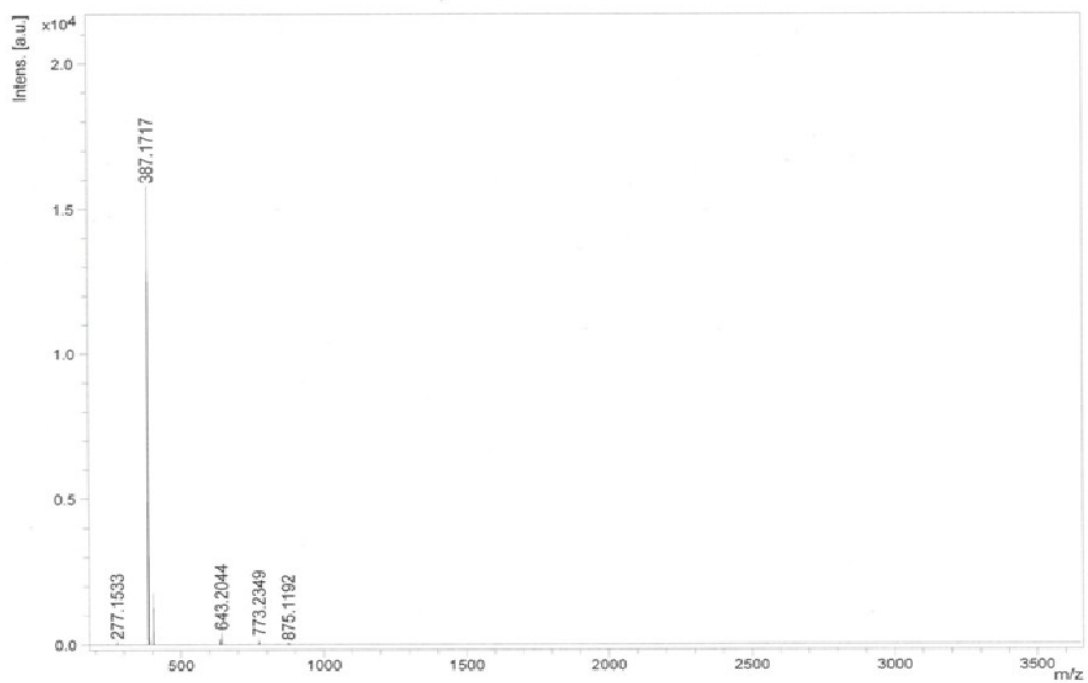

**Figure S5.** HR-MS spectrum of the probe **BVD**.

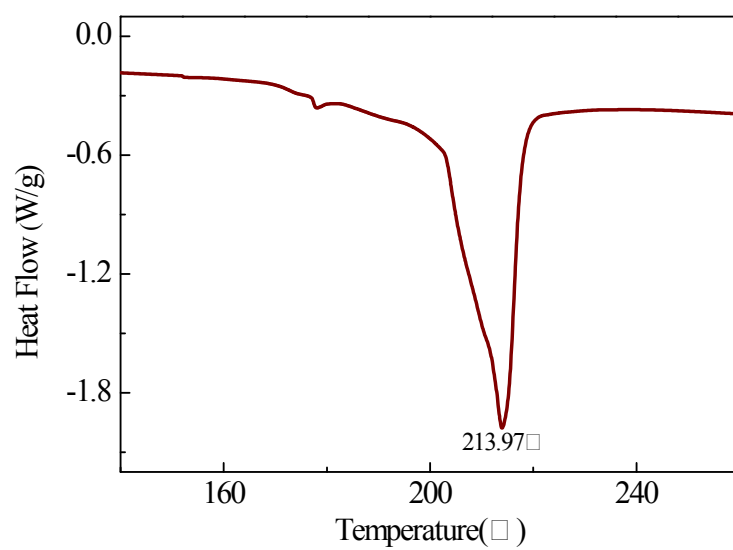

**Figure S6.** Differential scanning calorimetry of **BVD**.
